# Supplementary material
Source: PubMed Central journal article supplement (PMC5063652)
Supplement: NIHMS765875-supplement-01.pdf [file NIHMS765875-supplement-01.pdf]

### Protein Descriptions

>sp|Q8TDL5|LPLC1\_HUMAN Long palate, lung and nasal epithelium carcinoma-associated protein 1 OS=Homo sa  
 >sp|P15311|EZRI\_HUMAN Ezrin OS=Homo sapiens GN=EZR PE=1 SV=4;>tr|E7EQR4|E7EQR4\_HUMAN Ezrin OS=H  
 >sp|P63261|ACTG\_HUMAN Actin, cytoplasmic 2 OS=Homo sapiens GN  
 >sp|P03973|SLPI\_HUMAN Antileukoproteainase OS=Homo sapiens GN=SLPI PE=1 SV=2  
 >sp|O00299|CLIC1\_HUMAN Chloride intracellular channel protein 1 OS=Homo sapiens GN=CLIC1 PE=1 SV=4  
 >sp|P01024|CO3\_HUMAN Complement C3 OS=Homo sapiens GN=C3 PE=1 SV=2  
 >sp|Q9NP55|PLUNC\_HUMAN Protein Plunc OS=Homo sapiens GN=PLUNC PE=1 SV=1  
 >sp|P27487|DPP4\_HUMAN Dipeptidyl peptidase 4 OS=Homo sapiens GN=DPP4 PE=1 SV=2  
 >sp|P01833|PIGR\_HUMAN Polymeric immunoglobulin receptor OS=Homo sapiens GN=PIGR PE=1 SV=4  
 >sp|P80723|BASP1\_HUMAN Brain acid soluble protein 1 OS=Homo sapiens GN=BASP1  
 >sp|P68371|TBB2C\_HUMAN Tubulin beta-2C chain OS=Homo sapiens GN=TUBB2C PE=1 SV=1;>sp|Q13885|TBB2  
 >sp|P21926|CD9\_HUMAN CD9 antigen OS=Homo sapiens GN=CD9 PE=1 SV=4;>tr|A6NNI4|A6NNI4\_HUMAN Uncl  
 >sp|P06396|GELS\_HUMAN Gelsolin OS=Homo sapiens  
 >sp|P00441|SODC\_HUMAN Superoxide dismutase [Cu-Zn] OS=Homo sapiens GN=SOD1 PE=1 SV=2;>tr|A8MST3|/  
 >sp|P07355-2|ANXA2\_HUMAN Isoform 2 of Annexin A2 OS=Homo sapiens GN=ANXA2;>sp|P07355|AN  
 >sp|Q9H223|EHD4\_HUMAN EH domain-containing protein 4 OS=Homo sapiens GN=EHD4 PE=1 SV=1  
 >sp|P06733|ENOA\_HUMAN Alpha-enolase OS=Homo sapiens GN=ENO1 PE=1 SV=2;>sp|P06733-2|ENOA\_HUMAI  
 >sp|O60635|TSN1\_HUMAN Tetraspanin-1 OS=Homo sapiens GN=TSPAN1 PE=1 SV=2  
 >sp|O14745|NHRF1\_HUMAN Na(+)/H(+) exchange regulatory cofactor NHE-RF1 OS=Homo sapiens GN=SLC9A3R1  
 >tr|B4E1Z4|B4E1Z4\_HUMAN Complement factor B Ba fragment  
 >sp|P31949|S10AB\_HUMAN Protein S100-A11 OS=Homo sapiens GN=S100A11 PE=1 SV=2  
 >sp|Q06830|PRDX1\_HUMAN Peroxiredoxin-1 OS=Homo sapiens GN=PRDX1 PE=1 SV=1  
 >sp|P32119|PRDX2\_HUMAN Peroxiredoxin-2 OS=Homo sapiens GN=PRDX2 PE=1 SV=5;>tr|B4DF70|B4DF70\_HUM  
 >tr|H9KV70|H9KV70\_HUMAN Neutrophil gelatinase-associated lipocalin OS=Homo sapiens GN=LCN2 PE  
 >sp|Q99828|CIB1\_HUMAN Calcium and integrin-binding protein 1 OS=Homo sapiens GN=CIB1 PE=1 SV=4  
 >sp|P30838|AL3A1\_HUMAN Aldehyde dehydrogenase, dimeric NADP-preferring OS=Homo sapien  
 >sp|P11684|UTER\_HUMAN Uteroglobulin OS=Homo sapiens GN=SCGB1A1  
 >sp|P14618|KPYM\_HUMAN Pyruvate kinase isozymes M1/M2 OS=Homo sapiens GN=PKM2 PE=1 SV=4;>sp|P146  
 >sp|P15941-2|MUC1\_HUMAN Isoform 2 of Mucin-1 OS=Homo sapiens GN=MUC1;>sp|P15941|MUC1\_HUMAN M  
 >sp|P09211|GSTP1\_HUMAN Glutathione S-transferase P OS=Homo sapiens GN=GSTP1 PE=1 SV=2;>tr|A8MX94|A  
 >tr|E9PK25|E9PK25\_HUMAN Uncharacterized protein OS=Homo sapiens GN=CFL1 PE=4 SV=1;>sp|P23528|COF1\_>sp|Q9BW30|TPPP3\_HUMAN Tubulin polymerization-promoting protein family member 3  
 >sp|Q13938|CAYP1\_HUMAN Calcyphosin OS=Homo sapiens GN=CAPS PE=1 SV=1  
 >sp|P00450|CERU\_HUMAN Ceruloplasmin OS=Homo sapiens GN=CP PE=1 SV=1;>tr|E9PFZ2|E9PFZ2\_HUMAN Un  
 >sp|P37802|TAGL2\_HUMAN Transgelin-2 OS=Homo sapiens GN=TAGLN2 PE=1 SV=3  
 >tr|E7ETZ0|E7ETZ0\_HUMAN Uncharacterized protein Calmodulin OS=Homo sapiens GN=CALM1 PE=4 SV=1;>tr|B  
 >sp|P27105|STOM\_HUMAN Erythrocyte band 7 integral membrane protein  
 >sp|P08758|ANXA5\_HUMAN Annexin A5 OS=Homo sapiens GN=ANXA5 PE=1 SV=2;>tr|D6RBL5|D6RBL5\_HUMAN  
 >tr|E7EV01|E7EV01\_HUMAN Uncharacterized protein OS=Homo sapiens GN=CAPN5 PE=4 SV=2;>sp|O15484|CAI  
 >sp|O43490|PROM1\_HUMAN Prominin-1 OS=Homo sapiens GN=PROM1 PE=1 SV=1;>sp|O43490-2|PRC  
 >sp|P10909-2|CLUS\_HUMAN Isoform 2 of Clusterin OS=Homo sapiens GN=CLU;>sp|P10909-5|CLUS\_HU  
 >sp|P04080|CYTB\_HUMAN Cystatin-B OS=Homo sapiens GN=CSTB PE=1 SV=2;>tr|Q76LA1|Q76LA1\_HUMAN CSTI

Cell proliferation-inducing gene 35 protein;EPC-1;Pigment epithelium-derived factor;Serpin F1  
 >sp|P06703|S10A6\_HUMAN Protein S100-A6 OS=Homo sapiens GN=S100A6 PE=1 SV=1  
 >sp|P05109|S10A8\_HUMAN Protein S100-A8 OS=Homo sapiens GN=S100A8 PE=1 SV=1  
 >sp|P06702|S10A9\_HUMAN Protein S100-A9 OS=Homo sapiens GN=S100A9 PE=1 SV=1  
 >sp|Q9HCY8|S10AE\_HUMAN Protein S100-A14 OS=Homo sapiens GN=S100A14 PE=1 SV=1  
 >sp|Q96FQ6|S10AG\_HUMAN Protein S100-A16 OS=Homo sapiens GN=S100A16 PE=1 SV=1  
 >sp|Q9UGM3-6|DMBT1\_HUMAN Isoform 6 of Deleted in malignant brain tumors 1 protein OS=Homo sapiens GN  
 >sp|P04083|ANXA1\_HUMAN Annexin A1 OS=Homo sapiens GN=ANXA1 PE=1 SV=2;>tr|Q5TZZ9|Q5TZZ9\_HUMAN  
 >tr|E9PR17|E9PR17\_HUMAN CD59 glycoprotein OS=Homo sapiens  
 >sp|P07339|CATD\_HUMAN Cathepsin D OS=Homo sapiens GN=CTSD PE=1 SV=1;>tr|C9JH19|C9JH19\_HU  
 >sp|P54707-2|AT12A\_HUMAN Isoform 2 of Potassium-transporting ATPase alpha chain 2 OS=Homo sapiens  
 >sp|Q9HC84|MUC5B\_HUMAN Mucin-5B OS=Homo sapiens GN=MUC5B PE=1 SV=3;>tr|E9PBJ0|E9PBJ0\_HUMAN  
 >sp|O43653|PSCA\_HUMAN Prostate stem cell antigen OS=Homo sapiens GN=PSCA PE=1 SV=1  
 >sp|O00182|LEG9\_HUMAN Galectin-9 OS=Homo sapiens GN=LGALS9 PE=1 SV=2;>sp|O00182-2|LEG9\_HUMAN Is  
 >sp|P30740|ILEU\_HUMAN Leukocyte elastase inhibitor OS=Homo sapiens GN=SERPINB1 PE=1 SV=1  
 >sp|Q08380|LG3BP\_HUMAN Galectin-3-binding protein OS=Homo sapiens GN=LGALS3BP PE=1 SV=1;>tr|E7EW56  
 >sp|P17931|LEG3\_HUMAN Galectin-3 OS=Homo sapiens GN=LGALS3 PE=1 SV=5  
 >sp|Q14508|WFDC2\_HUMAN WAP four-disulfide core domain protein 2 OS=Homo sapiens GN=WFDC2 PE=1 SV=  
 >sp|P59665|DEF1\_HUMAN Neutrophil defensin 1 OS=Homo sapiens GN=DEFA1 PE=1 SV=1;>sp|P59666|DEF3\_HU  
 >sp|O00214-2|LEG8\_HUMAN Isoform 2 of Galectin-8 OS=Homo sapiens GN=LGALS8;>tr|C9JNF5|C9JNF5\_HUMAN  
 >sp|P61626|LYSC\_HUMAN Lysozyme C OS=Homo sapiens  
 >sp|P29508|SPB3\_HUMAN Serpin B3 OS=Homo sapiens GN=SERPINB3 PE=1 SV=2;>sp|P29508-2|SPB3\_HUMAN I  
 >sp|P35237|SPB6\_HUMAN Serpin B6 OS=Homo sapiens GN=SERPINB6 PE=1 SV=3  
 >tr|E9PDY6|E9PDY6\_HUMAN Uncharacterized protein OS=Homo sapiens GN=MUC4 PE=4 SV=1;>tr|E7ESK3|E7ES  
 >sp|P98088|MUC5A\_HUMAN Mucin-5AC (Fragments) OS=Homo sapiens GN=MUC5AC PE=1 SV=3  
 >sp|Q8WXI7|MUC16\_HUMAN Mucin-16 OS=Homo sapiens GN=MUC16 PE=1 SV=2  
 >sp|Q8N307|MUC20\_HUMAN Mucin-20 OS=Homo sapiens GN=MUC20 PE=1 SV=3;>sp|Q8N307-3|MUC20\_HUM

| Mol. Weight [kDa] | Unique Peptides EXP1 | Unique Peptides EXP2 | Unique Peptides EXP3 |
|-------------------|----------------------|----------------------|----------------------|
| 52.441            | 15                   | 13                   | 17                   |
| 69.4              | 6                    | 3                    | 8                    |
| 64.5              | 5                    | 4                    | 6                    |
| 14.326            | 4                    | 2                    | 4                    |
| 26                | 6                    | 0                    | 3                    |
| 187.15            | 27                   | 21                   | 31                   |
| 26.712            | 5                    | 6                    | 6                    |
| 88.278            | 14                   | 11                   | 16                   |
| 83.283            | 11                   | 12                   | 12                   |
| 22.6              | 6                    | 3                    | 2                    |
| 49.83             | 1                    | 1                    | 2                    |
| 25.416            | 5                    | 3                    | 6                    |
| 85                | 2                    | 2                    | 2                    |
| 15.936            | 2                    | 2                    | 3                    |
| 40,411            | 22                   | 29                   | 36                   |
| 61.174            | 15                   | 17                   | 18                   |
| 47.168            | 16                   | 17                   | 21                   |
| 26.301            | 4                    | 1                    | 3                    |
| 38.8              | 3                    | 5                    | 3                    |
| 140.94            | 40                   | 35                   | 38                   |
| 11.74             | 3                    | 5                    | 5                    |
| 22.11             | 8                    | 8                    | 9                    |
| 21.892            | 4                    | 6                    | 6                    |
| 22.902            | 16                   | 15                   | 16                   |
| 21.703            | 10                   | 11                   | 11                   |
| 50.3              | 12                   | 4                    | 12                   |
| 9.9               | 2                    | 2                    | 2                    |
| 57.936            | 21                   | 25                   | 27                   |
| 122.94            | 8                    | 8                    | 9                    |
| 24.35             | 9                    | 9                    | 9                    |
| 22.728            | 5                    | 8                    | 9                    |
| 18.9              | 8                    | 3                    | 6                    |
| 20.9              | 13                   | 11                   | 8                    |
| 122.2             | 18                   | 16                   | 21                   |
| 22.3              | 5                    | 2                    | 7                    |
| 16.966            | 10                   | 11                   | 12                   |
| 32                | 3                    | 2                    | 4                    |
| 35.936            | 6                    | 10                   | 12                   |
| 77.469            | 17                   | 20                   | 23                   |
| 97,201            | 15                   | 7                    | 15                   |
| 57,832            | 9                    | 10                   | 12                   |
| 11.139            | 4                    | 5                    | 5                    |

|        |    |    |    |
|--------|----|----|----|
| 46.3   | 5  | 6  | 8  |
| 10.18  | 2  | 2  | 2  |
| 10.834 | 1  | 2  | 2  |
| 13.242 | 4  | 4  | 5  |
| 11.662 | 6  | 6  | 7  |
| 11.801 | 4  | 6  | 7  |
| 274.46 | 18 | 15 | 19 |
| 38.714 | 16 | 20 | 21 |
| 14.5   | 5  | 3  | 6  |
| 44.5   | 8  | 8  | 10 |
| 116.5  | 5  | 2  | 7  |
| 596.33 | 64 | 63 | 72 |
| 26.3   | 3  | 3  | 3  |
| 39.518 | 4  | 4  | 4  |
| 42.741 | 9  | 12 | 12 |
| 65.33  | 7  | 6  | 8  |
| 26.152 | 7  | 6  | 7  |
| 12.993 | 5  | 6  | 8  |
| 10.6   | 1  | 1  | 1  |
| 40.397 | 6  | 5  | 7  |
| 16.5   | 2  | 3  | 1  |
| 44.564 | 7  | 8  | 9  |
| 42.621 | 4  | 3  | 6  |
| 542.3  | 26 | 28 | 32 |
| 526.6  | 37 | 10 | 38 |
| 2284.3 | 19 | 25 | 21 |
| 71.981 | 2  | 2  | 2  |

| average unique peptide | Sequence Coverage [%] |
|------------------------|-----------------------|
| 15                     | 46.5                  |
| 6                      | 34.3                  |
| 5                      | 18                    |
| 3                      | 22.7                  |
| 3                      | 27                    |
| 26                     | 22.4                  |
| 6                      | 34.4                  |
| 14                     | 19.5                  |
| 12                     | 20.7                  |
| 4                      | 63                    |
| 1                      | 43.1                  |
| 5                      | 25.4                  |
| 2                      | 26                    |
| 2                      | 32.5                  |
| 29                     | 65                    |
| 17                     | 44.9                  |
| 18                     | 52.5                  |
| 3                      | 15.4                  |
| 4                      | 15                    |
| 38                     | 23                    |
| 4                      | 43.8                  |
| 8                      | 53.3                  |
| 5                      | 32.3                  |
| 16                     | 75                    |
| 11                     | 63.9                  |
| 9                      | 40                    |
| 2                      | 61                    |
| 24                     | 53.9                  |
| 8                      | 8.9                   |
| 9                      | 55                    |
| 7                      | 43.6                  |
| 6                      | 58                    |
| 11                     | 53                    |
| 18                     | 22                    |
| 5                      | 30                    |
| 11                     | 58                    |
| 3                      | 22                    |
| 9                      | 42.8                  |
| 20                     | 35.9                  |
| 12                     | 23                    |
| 10                     | 20                    |
| 5                      | 79.6                  |

|    |      |
|----|------|
| 6  | 26   |
| 2  | 16.7 |
| 2  | 23.7 |
| 4  | 44.7 |
| 6  | 80.8 |
| 6  | 58.3 |
| 17 | 33   |
| 19 | 60.4 |
| 5  | 19   |
| 9  | 35   |
| 5  | 10   |
| 66 | 20.3 |
| 3  | 15   |
| 4  | 13.2 |
| 11 | 38   |
| 7  | 16.4 |
| 7  | 28.8 |
| 6  | 25.8 |
| 1  | 9.6  |
| 6  | 20.6 |
| 2  | 13   |
| 8  | 46.2 |
| 4  | 22.3 |
| 29 | 7.9  |
| 28 | 15   |
| 22 | 16.7 |
| 2  | 2.8  |

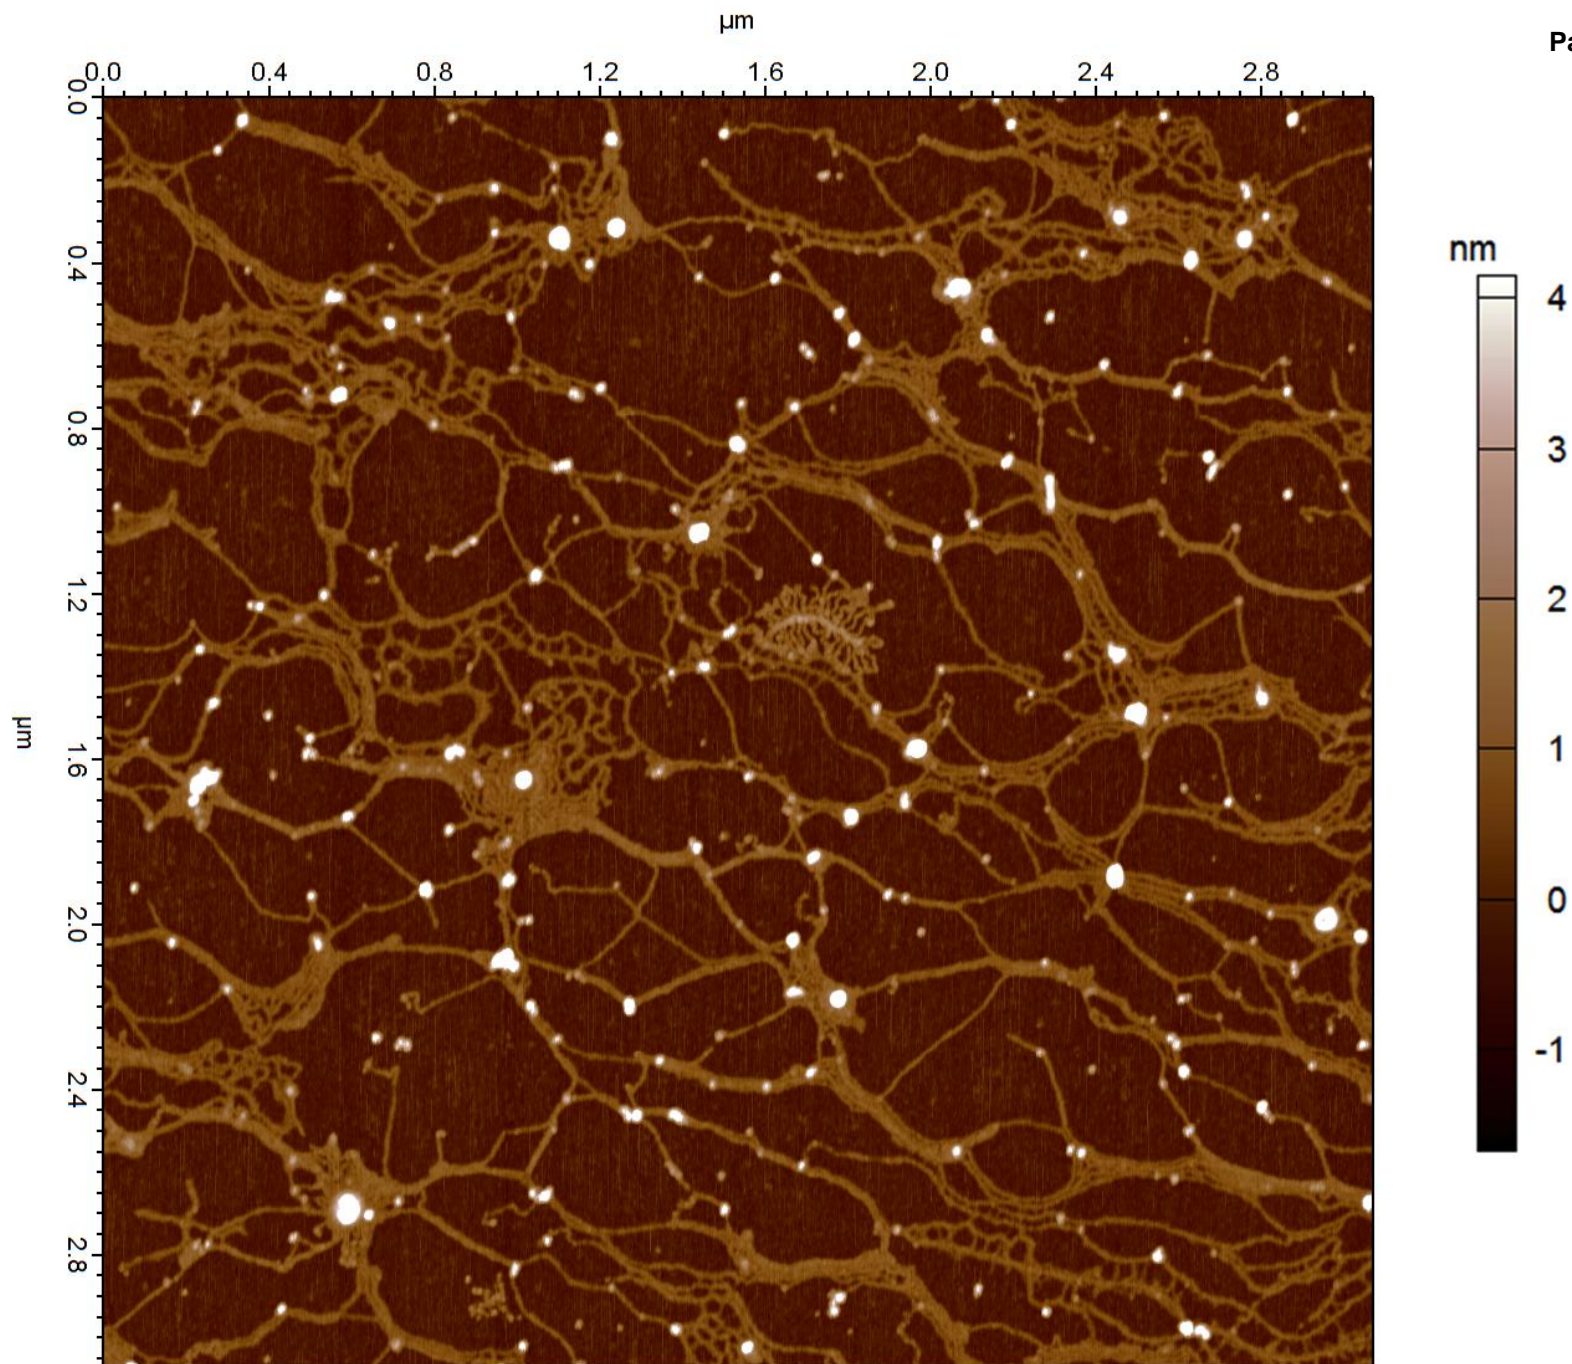

Supplementary Figure S1

- **Supplementary figure S1:** A raw topographical high resolution AFM image of the mucin interactome, mucins and their associated proteins, derived from HBE cells deposited on a mica surface. Mucins can be seen as the long fibers, both in individual and clustered configurations, while other proteins, as well as the hydrophobic non-glycosylated regions of the mucins, appear as circular nodes with different heights and sizes. A 3 dimensional rendering of this image, as well as detailed information can be found in figure 3. The height scale on the right is capped at 4 nm to emphasize the difference between glycosylated and protein regions of mucins, and other proteins. Features in bright white range in height from 4-14 nm.



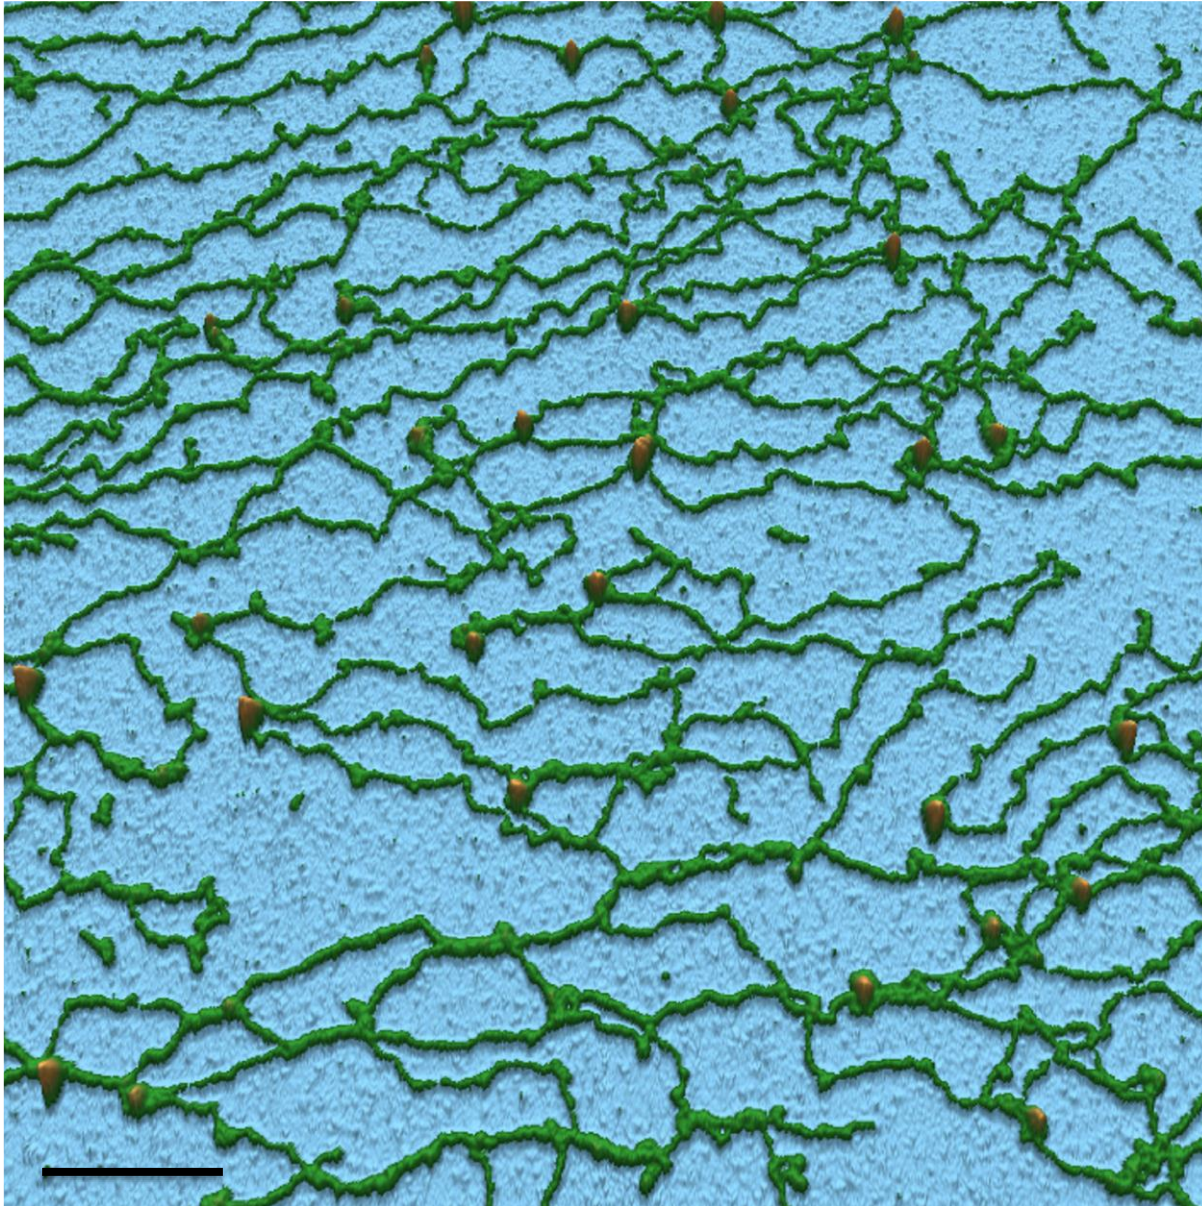

Supplementary Figure S2

- **Supplementary figure S2: A 3-dimensional rendering of an Atomic Force Microscope image of the organizational framework of the purified MUC5B:** MUC5B was isolated as essentially described previously (ref 16, 43) under dissociative conditions and deposited onto mica and observed in the Cypher AFM. Glycosylated domains/chains of the mucins are shown in green and measure approximately 1 nm in height. The brown coloring represents protein regions of the framework and mostly consist of the naked protein domains of the mucins. Although the mucin was highly purified, there may be residual proteins that covalently interact with the mucin's protein domains on the brown nodes. As compared to Figure 3, the number of brown protein nodes are significantly reduced, and the mucin network is more uniform and linear with almost no clustering and no compact form present. Scale bar 250 nm.

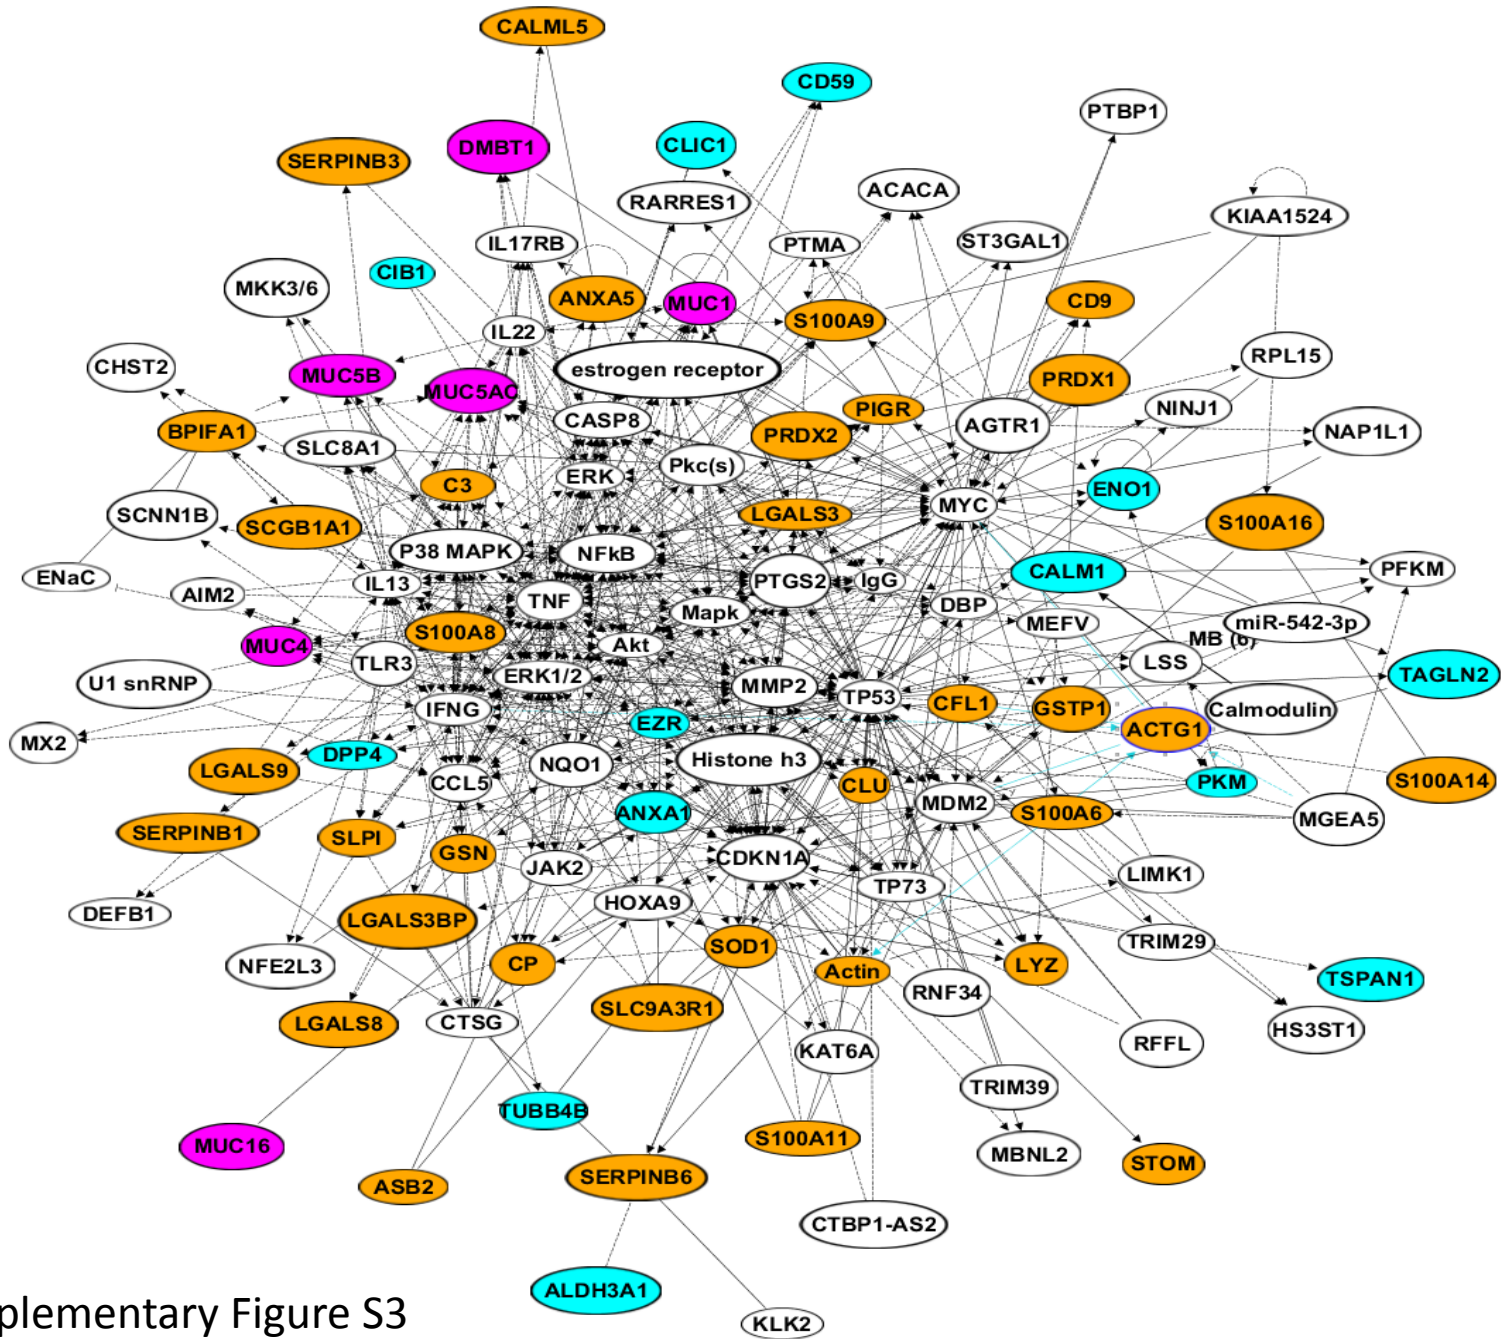

Supplementary Figure S3



- **Supplementary Figure S3. The pathways in which the proteins in the mucin interactome are involved, as demonstrated by the Ingenuity Pathway analysis:** Of the 66 proteins detected, the application used 56 to generate nine networks that we were able to merge including the networks Cell-To-Cell Signaling and Interaction, Tissue Development, Cellular Movement, Cell Death and Survival, Cell Signaling, Molecular Transport, Inflammatory Disease, and Inflammatory Response networks. We highlighted the mucin and mucin-like proteins with magenta, the exosomal proteins with light blue and the mucin interactome proteins with orange. The white proteins are the proteins that interacted with our data set. The different protein shapes suggest different protein functions. We used the default molecule shapes except for the enzymes, to which we have assigned a pentagonal shape. Magenta: Mucins, Blue: exosomal/vesicular proteins, Orange: mucin interactome, White: putative interacting proteins of mucin-interactome
